# Supplementary material
Source: PubMed Central journal article supplement (PMC2564846)
Supplement: NIHMS27373-supplement-01.pdf [file NIHMS27373-supplement-01.pdf]

**Supplemental Material****Table S1: Brown fat genes regulated by PRDM16**

|                                       | bat/wat<br>fold change | prdm16/ctl<br>adipocytes | p value | 9eb2 bat<br>fold scr/<br>si-prdm16 | p value | primary bat<br>fold scr/<br>si-prdm16 | p value |
|---------------------------------------|------------------------|--------------------------|---------|------------------------------------|---------|---------------------------------------|---------|
| <b>Brown fat cell selective genes</b> |                        |                          |         |                                    |         |                                       |         |
| <b>otopetrin1</b>                     | 221.10                 | 15.4+/-3.4               | 0.0019  | 3.60                               | 0.0005  | 0.49                                  | 0.1585  |
| * <b>cpt1b</b>                        | 157.33                 | 2.6+/-0.85               | 0.0348  | 0.19                               | 0.0002  | 0.33                                  | 0.0511  |
| * <b>cidea</b>                        | 150.98                 | 436+/-110                | 0.0003  | 0.19                               | 0.0000  | 0.16                                  | 0.0004  |
| * <b>UCP1</b>                         | 138.62                 | 7.4+/-2.3                | 0.0085  | 0.03                               | 0.0030  | 0.20                                  | 0.0126  |
| * <b>cox7a1</b>                       | 112.22                 | 3.1+/-0.9                | 0.0320  | 0.21                               | 0.0006  | 0.57                                  | 0.0043  |
| * <b>cox8b</b>                        | 83.07                  | 137+/-23                 | 0.0005  | 0.12                               | 0.0004  | 0.27                                  | 0.0032  |
| <b>ntrk3</b>                          | 47.44                  | 16.6+/-2.5               | 0.0004  | 0.38                               | 0.0056  | 0.67                                  | 0.1913  |
| <b>cpn2</b>                           | 47.26                  | 3+/-1.4                  | 0.0865  | 1.70                               | 0.0696  | 0.30                                  | 0.0430  |
| <b>deiodinase d2</b>                  | 38.76                  | 3.7+/-1.1                | 0.0122  | 2.40                               | 0.0090  | 0.30                                  | 0.0030  |
| <b>elov16</b>                         | 30.39                  | 1.8+/-0.3                | 0.0296  | 1.26                               | 0.0064  | 1.02                                  | 0.9147  |
| <b>S100b</b>                          | 27.89                  | 5.4+/-1.3                | 0.0005  | 0.34                               | 0.0010  | 0.75                                  | 0.4706  |
| * <b>gpd2</b>                         | 26.84                  | 1.8+/-0.4                | 0.0003  | 0.37                               | 0.0002  | 0.26                                  | 0.0110  |
| * <b>PGC-1<math>\alpha</math></b>     | 24.22                  | 10.2+/-2.2               | 0.0002  | 0.35                               | 0.0001  | 0.39                                  | 0.0070  |
| <b>err-<math>\gamma</math></b>        | 23.75                  | 1.60+/-0.2               | 0.3490  | 0.25                               | 0.0010  | 0.40                                  | 0.0324  |
| * <b>eva1</b>                         | 23.10                  | 32.2+/-6.7               | 0.0008  | 0.29                               | 0.0011  | 0.28                                  | 0.0503  |
| * <b>elovl3</b>                       | 21.06                  | 5.9+/-1.4                | 0.0040  | 0.19                               | 0.0018  | 0.54                                  | 0.0047  |
| <b>acaa2</b>                          | 18.87                  | 2.8+/-0.6                | 0.0010  | 0.79                               | 0.0950  | 0.47                                  | 0.0564  |
| * <b>ppar-<math>\alpha</math></b>     | 18.21                  | 5.8+/-1.9                | 0.0019  | 0.45                               | 0.0039  | 0.58                                  | 0.1300  |
| * <b>acss1</b>                        | 13.78                  | 3.03+/-1.6               | 0.0013  | 0.22                               | 0.0002  | 0.15                                  | 0.0336  |
| <b>PRDM16</b>                         | 10.80                  | 255+/-31                 | 0.0001  | 0.29                               | 0.0002  | 0.28                                  | 0.0259  |
| <b>White fat cell selective genes</b> |                        |                          |         |                                    |         |                                       |         |
| * <b>serpina3k</b>                    | 0.02                   | 0.4+/-0.13               | 0.00004 | 3.90                               | 0.0010  | 1.40                                  | 0.0403  |
| * <b>resistin</b>                     | 0.02                   | 0.38+/-0.11              | 0.0105  | 1.73                               | 0.0274  | 1.34                                  | 0.0073  |
| <b>resistin like-a</b>                | 0.03                   | 10.5+/-2.2               | 0.0013  | 1.29                               | 0.5900  | 1.18                                  | 0.8700  |
| <b>psat1</b>                          | 0.03                   | 0.43+/-0.11              | 0.0034  | 0.78                               | 0.0014  | 1.30                                  | 0.1390  |
| <b>ccl6</b>                           | 0.04                   | 2.8+/-0.8                | 0.0521  | 1.26                               | 0.3821  | 1.75                                  | 0.0912  |
| <b>fads3</b>                          | 0.06                   | 0.64+/-0.14              | 0.0003  | 0.62                               | 0.0021  | 1.12                                  | 0.6455  |
| <b>aldh1a1</b>                        | 0.07                   | 3.5+/-0.8                | 0.0002  | 0.92                               | 0.3565  | 0.62                                  | 0.1367  |
| <b>hmgn3</b>                          | 0.13                   | 1.3+/-0.29               | 0.2040  | 2.10                               | 0.0007  | 1.41                                  | 0.0114  |
| <b>app</b>                            | 0.16                   | 0.87+/-0.2               | 0.3046  | 1.07                               | 0.4809  | 0.86                                  | 0.4652  |

\*genes regulated by PRDM16 that show perfect correlation across all experiments.

Shaded entries represent genes that were regulated by ectopic PRDM16 and reciprocally regulated in either PRDM16-depleted brown fat cell lines or in PRDM16-depleted primary brown fat cells.

**Table S2. Primers used for real-time PCR analysis**

| Gene        | Forward primer (5' - 3')       | Reverse primer (5' - 3')          |
|-------------|--------------------------------|-----------------------------------|
| acaa2       | GCC TCC ACT CAC ATT GGT TT     | ATT GAA GAA AGC TGG GCT GA        |
| acss1       | TCC TCC AGG GTA GTG GTG TC     | ACC AGA TCC TGG TGG TGA AG        |
| adiponectin | GCACTGGCAAGTTCTACTGCAA         | GTAGGTGAAGAGAACGGCCTTGT           |
| aldh1a1     | TTT GGC CAC ACA CTC CAA TA     | GGG CTG ACA AGA TTC ATG GT        |
| ap2         | ACA CCG AGA TTT CCT TCA AAC TG | CCA TCT AGG GTT ATG ATG CTC TTC A |
| ccl6        | GTG GCA TAA GAG AAG CAG CAG TC | TAT CCT TGT GGC TGT CCT TGG       |
| cidea       | TGC TCT TCT GTA TCG CCC AGT    | GCC GTG TTA AGG AAT CTG CTG       |
| cox4i1      | ACCAAGCGAATGCTGGACAT           | GGCGGAGAAGCCCTGAA                 |
| cox5b       | GCTGCATCTGTGAAGAGGACAAC        | CAGCTTGTAAATGGGTCCACAGT           |
| cox7a1      | CAG CGT CAT GGT CAG TCT GT     | AGA AAA CCG TGT GGC AGA GA        |
| cox8b       | GAA CCA TGA AGC CAA CGA CT     | GCG AAG TTC ACA GTG GTT CC        |
| coxIII      | GCAGGATTCTTCTGAGCGTTCT         | GTCAGCAGCCTCCTAGATCATGT           |
| cpn2        | GCG TTG TCC TTC AGG CTT AG     | TCC CCA CAT CTG TTC TCA CA        |
| cpt1b       | CGA GGA TTC TCT GGA ACT GC     | GGT CGC TTC TTC AAG GTC TG        |
| cyt-c       | GCAAGCATAAGACTGGACCAA          | TTGTTGGCATCTGTGTAAGAGAATC         |
| Dio2        | CAGTGTGGTGCACGTCTCCAATC        | TGAACCAAAGTTGACCACCAG             |
| elovl3      | TCC GCG TTC TCA TGT AGG TCT    | GGA CCT GAT GCA ACC CTA TGA       |
| elovl6      | TGC TGC ATC CAG TTG AAG AC     | TGC CAT GTT CAT CAC CTT GT        |
| err-γ       | TTC TGC ACA GCT TCC ACA TC     | GGA AGA ATT CGT CAC CCT CA        |
| eval        | GTC CCA ACC AGA CCA TCA AC     | CTC CAT CTT GCT CTG GAA GC        |
| fads3       | GTG ATC CAC ACG AAC CAG TG     | TCC CGC TTT TTC TTG TCC TA        |
| glut4       | GTG ACT GGA ACA CTG GTC CTA    | CCA GCC AGT TGC ATT GTA G         |
| GyK         | CCGCGAAGAAAGCAGTTCTG           | CAAAAAACGTGTCGAGCTGGTA            |
| hmgn3       | AGA CTC CGG TTT TGG TGG AAC    | CAC AGA GGG CAA AGA TGG AAC       |
| lhx8        | ACA CGA GCT GCT ACA TTA AGG A  | CCC AGT CAG TCG AGT GGA TG        |
| ntrk3       | TGG CTC ACA CTG ATC TCT GG     | GCC AGA GCC TTT ACT GCA TC        |
| otopetrin1  | ACT AGG ACC CCG TCG AAT CT     | ACC ATG CTC TAC GTG CTG TG        |
| pgc1α       | CCC TGC CAT TGT TAA GAC C      | TGC TGC TGT TCC TGT TTT C         |
| ppar-α      | GCGTACGGCAATGGCTTTAT           | GAACGGCTTCCTCAGGTTCTT             |
| ppar-γ      | GTGCCAGTTTCGATCCGTAGA          | GGCCAGCATCGTGTAGATGA              |
| prdm16      | CAG CAC GGT GAA GCC ATT C      | GCG TGC ATC CGC TTG TG            |
| prdm16-utr  | TGG CCT TCA TCA CCT CTC TGA A  | TTT CTG ATC CAC GC GGC TCC TGT GA |
| psat1       | TAC CGC CTT GTC AAG AAA CC     | AGT GGA GCG CCA GAA TAG AA        |
| resistin    | CTG TCC AGT CTA TCC TTG CAC AC | CAG AAG GCA CAG CAG TCT TGA       |
| retn-like-α | TCC ACT CTG GAT CTC CCA AGA    | TCC CTC CAC TGT AAC GAA GAC TC    |
| s100b       | GTC CAG CGT CTC CAT CAC TT     | GGT GAC AAG CAC AAG CTG AA        |
| serpina3k   | GGC TGA AGG CAA AGT CAG TGT    | TGG AAT CTG TCC TGC TGT CCT       |
| tbp         | GAA GCT GCG GTA CAA TTC CAG    | CCC CTT GTA CCC TTC ACC AAT       |
| ucp1        | ACT GCC ACA CCT CCA GTC ATT    | CTT TGC CTC ACT CAG GAT TGG       |
| zic1        | CTG TTG TGG GAG ACA CGA TG     | CCT CTT CTC AGG GCT CAC AG        |

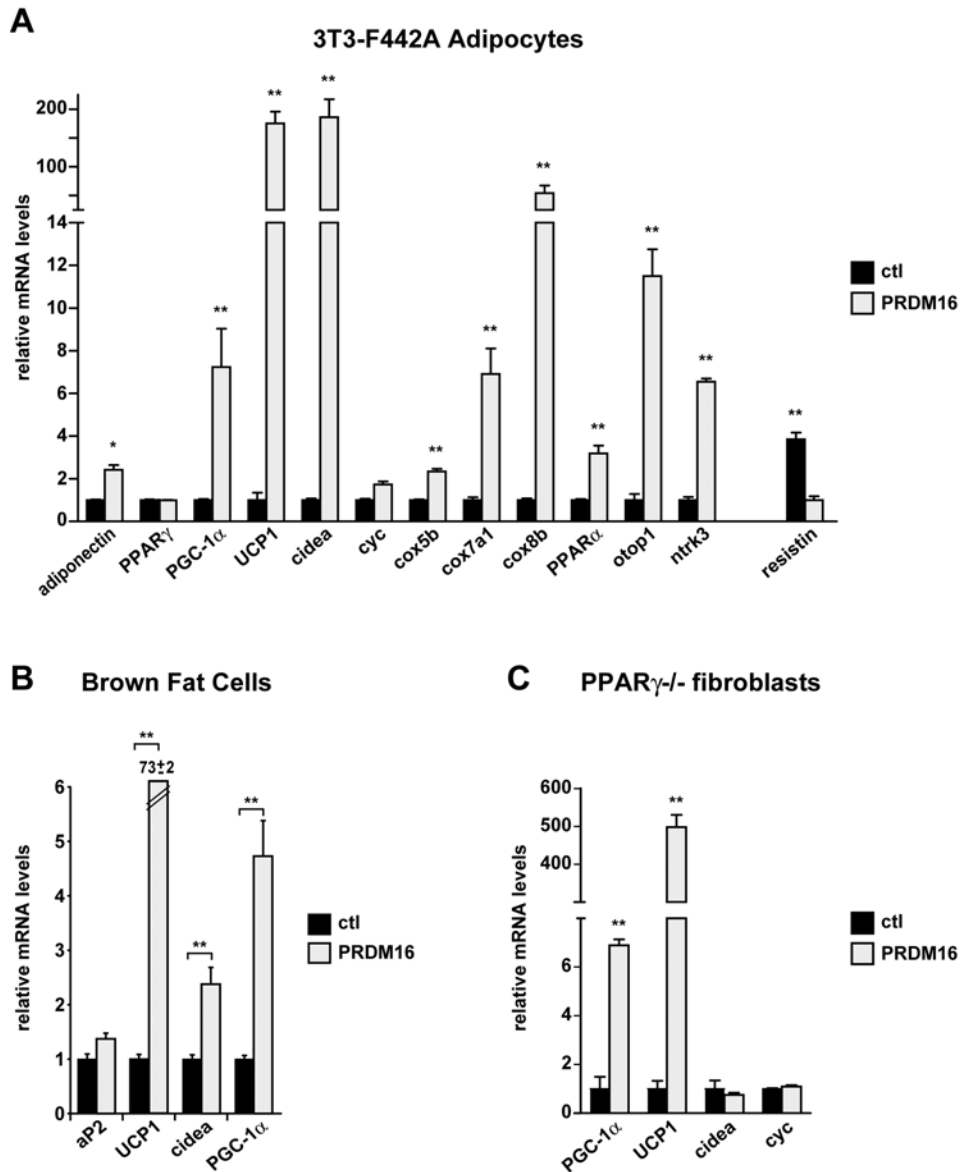

**Figure S1. PRDM16 activates BAT genes in other fat cellular systems**

(A) Real-time PCR analysis of gene expression (as indicated) in adipocytes (day 6) from 3T3-F442A preadipocytes expressing retroviral- PRDM16 or –vector control (ctl). (B) Real-time PCR analysis of fat-related gene expression (as indicated) in adipocytes (day 4) from brown fat preadipocytes expressing retroviral- PRDM16 or –vector control (ctl). (C) Real-time PCR analysis of gene expression (as indicated) in PPAR $\gamma$ –deficient fibroblasts expressing retroviral- PRDM16 or –vector control (ctl) that had been treated with the adipogenic differentiation protocol. (n=3, mean  $\pm$  SD). \* p < 0.05; \*\* p < 0.01

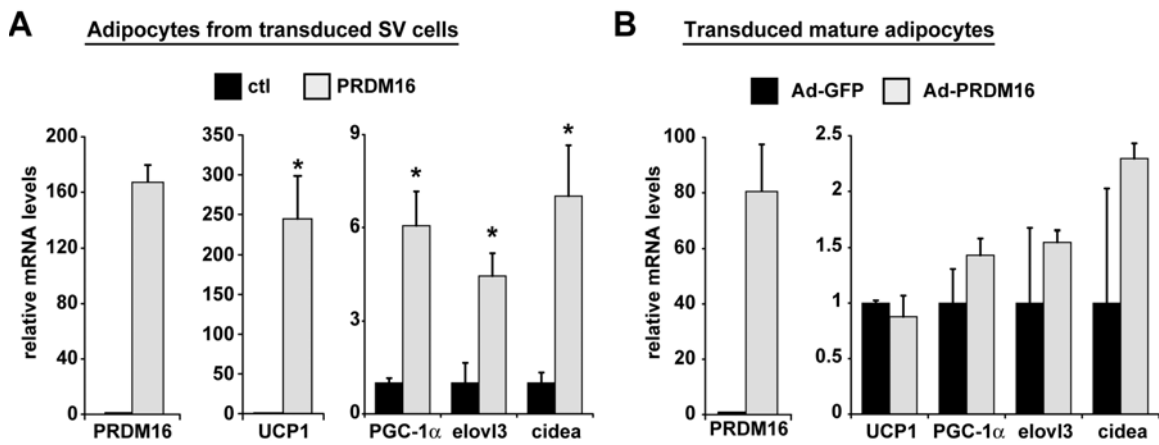

**Figure S2. PRDM16 function is required before or during adipocyte differentiation**

(A, B) Real-time PCR was used to measure the expression of brown fat cell-selective genes (as indicated) in adipocytes from PRDM16- or ctl- transduced stromal-vascular cells isolated from mouse white fat (A); and in mature fat cells from the same tissue transduced with adenoviral-PRDM16 or -GFP control (B). (n=3, mean  $\pm$  SD). \*  $p < 0.05$ ; \*\*  $p < 0.01$

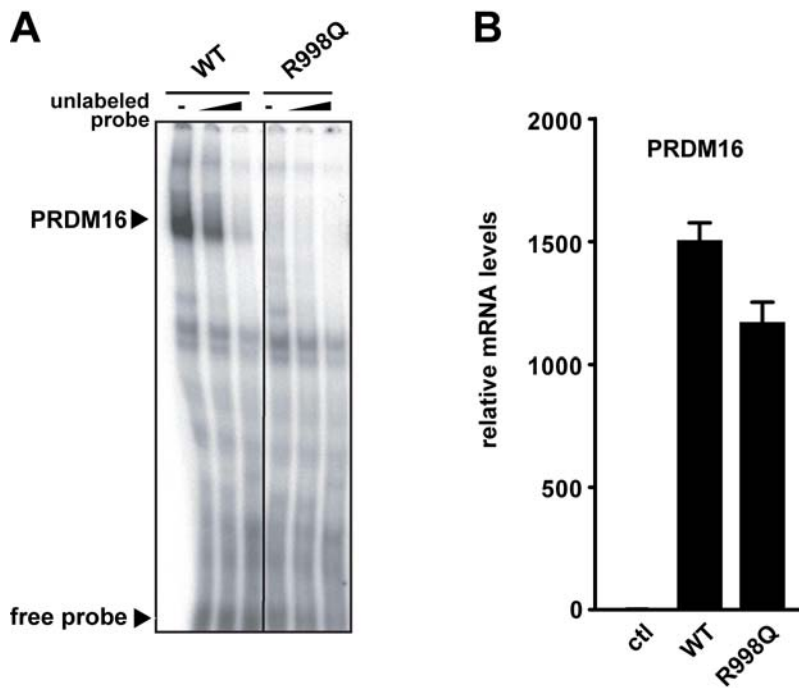

**Figure S3. A R998Q mutant allele of PRDM16 does not bind DNA**

(A) Electrophoretic mobility shift assays (EMSA) were performed using *in vitro* translated wildtype PRDM16 and R998Q mutant proteins to investigate their ability to bind DNA containing a consensus binding site for PRDM16. (B) Real-time PCR analysis of wildtype and R998Q mutant PRDM16 mRNA levels in adipocytes at day 6 of differentiation (n=3, mean  $\pm$  SD).

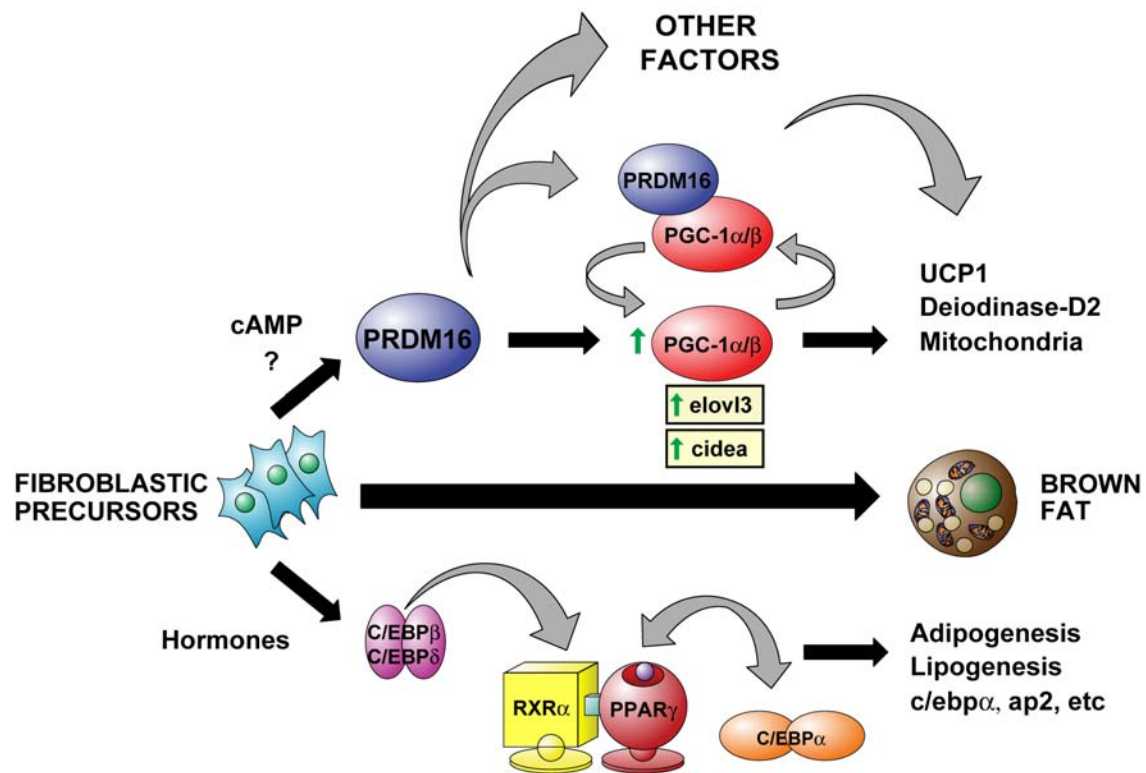

**Figure S4. Model of PRDM16 function in brown fat determination**

PRDM16 expression is induced in fat cell precursors during brown fat adipogenesis. As shown here, PRDM16 activates a broad program of brown fat determination including expression of PGC-1 $\alpha$ , elov13, cidea and PRDM16 itself. Importantly, PRDM16 action renders fat cells responsive to adrenergic signals, such that expression of UCP1 and other thermogenic genes can be further increased by cAMP. The function of PRDM16 is mediated, at least in part, via its physical interaction with PGC-1 $\alpha$  and PGC-1 $\beta$ . PRDM16 regulates brown fat character without influencing the general program of adipocyte differentiation (common to BAT and WAT) that is controlled by PPAR $\gamma$  and C/EBP family members.
